# Supplementary material
Source: Springer Nature journal article supplement (https://www.springermedizin.de/resource/supplementary/13054_2010_8715_MOESM3_ESM.pdf/9734072)
Supplement: MOESM3 [file 9734072]

**EMS system:**  
Response time  
Provider competence  
Technique  
Drugs  
Diagnostic accuracy  
No of attempts  
Verification of tube position

Contemporary treatment

**In-hospital:**  
System factors  
Patient factors  
Adverse events

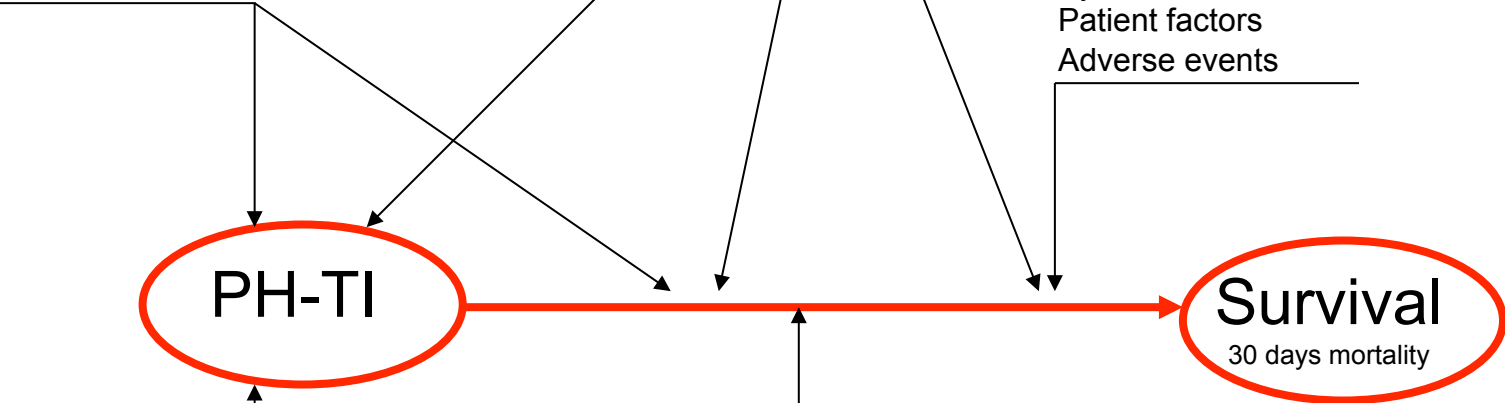

**PH-TI**

**Survival**

30 days mortality

**Pre intervention:**  
Age  
Patient category  
Ventilatory status  
Circulatory status  
Level of consciousness  
Co-morbidity

**Post intervention:**  
Hypotension  
Hypertension  
Hypercapnia  
Hypoxia  
Hypothermia  
Aspiration  
Misplaced tube  
Pain
